# Supplementary material for: Proteomics informed by transcriptomics for characterising active transposable elements and genome annotation in Aedes aegypti
Source: PubMed Central journal article supplement (PMC5248466; doi:10.1186/s12864-016-3432-5), 2017-01-19
Supplement: 12864_2016_3432_MOESM3_ESM.pdf [file 12864_2016_3432_MOESM3_ESM.pdf]

**Non-Aedes Insect Genes (Pertaining to Fig. 2 and 3).**

If not specified, supercontig has not been assigned chromosomal location.

|                                            | Trinity ID | Supercontig | Chromosomal Location | Annotation |
|--------------------------------------------|------------|-------------|----------------------|------------|
| Homology to Known <i>Ae. aegypti</i> Genes | 75         | 1.1657      |                      | AAEL012117 |
|                                            | 545        | 1.93        |                      | AAEL003613 |
|                                            | 1476       | 1.9         |                      | AAEL000509 |
|                                            | 3324       | 1.1411      |                      | AAEL015034 |
|                                            | 3738       | 1.195       |                      | AAEL006222 |
|                                            | 4203       | 1.4383      |                      | AAEL017530 |
|                                            | 4627       | 1.82        | 1q43                 | AAEL801258 |
|                                            | 5546       | 1.1647      |                      | AAEL015242 |
|                                            | 6150       | 1.11        | 3q11                 | AAEL000565 |
|                                            | 6235       | 1.327       |                      | AAEL008459 |
|                                            | 6462       | 1.333       |                      | AAEL008586 |
|                                            | 7068       | 1.31        | 2p13                 | AAEL001388 |
|                                            | 7478       | 1.542       |                      | AAEL011111 |
|                                            | 7738       | 1.8         | 3p12                 | AAEL000429 |
|                                            | 8084       | 1.588       |                      | AAEL011533 |
|                                            | 8390       | 1.481       |                      | AAEL010501 |
|                                            | 8565       | 1.507       |                      | AAEL010781 |
|                                            | 8804       | 1.321       |                      | AAEL008382 |
|                                            | 8886       | 1.55        | 2q24                 | AAEL002382 |
|                                            | 9220       | 1.465       |                      | AAEL017054 |
| 9268                                       | 1.716      |             | AAEL012608           |            |
| New Annotation                             | 1          | 1.931       |                      |            |
|                                            | 34         | 1.956       |                      |            |
|                                            | 45         | 1.402       |                      |            |
|                                            | 118        | 1.541       |                      |            |
|                                            | 188        | 1.1224      |                      |            |
|                                            | 263        | 1.68        | 1q44                 |            |
|                                            | 273        | 1.1096      |                      |            |
|                                            | 366        | 1.36        | 2p42                 |            |
|                                            | 391        | 1.4         | 1p34                 |            |
|                                            | 395        | 1.1117      |                      |            |
|                                            | 487        | 1.126       |                      |            |
|                                            | 511        | 1.35        |                      |            |
|                                            | 776        | 1.231       |                      |            |
|                                            | 855        | 1.97        |                      |            |
|                                            | 876        | 1.3         | 3q12                 |            |
|                                            | 930        | 1.154       |                      |            |
|                                            | 1004       | 1.148       | 1p34                 |            |
|                                            | 1124       | 1.1159      |                      |            |
|                                            | 1164       | 1.191       |                      |            |
|                                            | 1166       | 1.443       |                      |            |
| 1189                                       | 1.229      |             |                      |            |
| 1206                                       | 1.575      |             |                      |            |
| 1325                                       | 1.17       | 3p22        |                      |            |

**Non-Aedes Insect Genes (Pertaining to Fig. 2 and 3). (continued)**

|                | <b>Trinity ID</b> | <b>Supercontig</b> | <b>Chromosomal Location</b> | <b>Annotation</b> |
|----------------|-------------------|--------------------|-----------------------------|-------------------|
|                | 1407              | 1.735              |                             |                   |
|                | 1512              | 1.567              |                             |                   |
|                | 1536              | 1.16               | 3q21                        |                   |
|                | 1537              | 1.754              |                             |                   |
|                | 1752              | 1.787              |                             |                   |
|                | 1815              | 1.253              |                             |                   |
|                | 1917              | 1.833              |                             |                   |
|                | 1935              | 1.704              | 2p34                        |                   |
|                | 1939              | 1.389              |                             |                   |
|                | 1941              | 1.326              | 1q12                        |                   |
|                | 2016              | 1.132              | 2p32                        |                   |
|                | 2087              | 1.418              |                             |                   |
|                | 2169              | 1.171              | 3q11                        |                   |
|                | 2196              | 1.28               | 2p23                        |                   |
|                | 2272              | 1.619              |                             |                   |
|                | 2360              | 1.147              | 1q13                        |                   |
|                | 2376              | 1.225              |                             |                   |
|                | 2391              | 1.54               |                             |                   |
|                | 2548              | 1.160              | 3q21                        |                   |
|                | 2560              | 1.11               | 3q11                        |                   |
| New Annotation | 2561              | 1.271              |                             |                   |
|                | 2599              | 1.964              |                             |                   |
|                | 2799              | 1.490              |                             |                   |
|                | 2903              | 1.386              | 3p42                        |                   |
|                | 2949              | 1.753              |                             |                   |
|                | 3014              | 1.856              |                             |                   |
|                | 3084              | 1.8                | 3p12                        |                   |
|                | 3089              | 1.13               | 3q44                        |                   |
|                | 3140              | 1.50               | 1p33                        |                   |
|                | 3166              | 1.1628             |                             |                   |
|                | 3168              | 1.396              |                             |                   |
|                | 3214              | 1.46               | 2p21                        |                   |
|                | 3233              | 1.185              |                             |                   |
|                | 3234              | 1.474              |                             |                   |
|                | 3338              | 1.65               |                             |                   |
|                | 3434              | 1.219              |                             |                   |
|                | 3462              | 1.369              |                             |                   |
|                | 3504              | 1.1104             |                             |                   |
|                | 3521              | 1.204              |                             |                   |
|                | 3673              | 1.274              | 2q12                        |                   |
|                | 3702              | 1.213              |                             |                   |
|                | 3911              | 1.199              |                             |                   |
|                | 3915              | 1.1002             |                             |                   |
|                | 3951              | 1.956              |                             |                   |
|                | 4063              | 1.291              |                             |                   |
|                | 4068              | 1.81               | 1q21                        |                   |

**Non-Aedes Insect Genes (Pertaining to Fig. 2 and 3). (continued)**

|                | <b>Trinity ID</b> | <b>Supercontig</b> | <b>Chromosomal Location</b> | <b>Annotation</b> |
|----------------|-------------------|--------------------|-----------------------------|-------------------|
|                | 4179              | 1.694              |                             |                   |
|                | 4182              | 1.715              |                             |                   |
|                | 4622              | 1.2330             |                             |                   |
|                | 4654              | 1.488              |                             |                   |
|                | 4656              | 1.352              | 2q11                        |                   |
|                | 4755              | 1.510              |                             |                   |
|                | 4822              | 1.185              |                             |                   |
|                | 4849              | 1.291              |                             |                   |
|                | 4853              | 1.215              |                             |                   |
|                | 5019              | 1.80               |                             |                   |
|                | 5099              | 1.24               | 2q24                        |                   |
|                | 5241              | 1.386              | 3p42                        |                   |
|                | 5272              | 1.111              | 1p21                        |                   |
|                | 5307              | 1.75               | 1p14                        |                   |
|                | 5467              | 1.283              |                             |                   |
|                | 5469              | 1.559              |                             |                   |
|                | 5498              | 1.1152             |                             |                   |
|                | 5623              | 1.184              |                             |                   |
|                | 5634              | 1.274              | 2q12                        |                   |
|                | 5720              | 1.236              |                             |                   |
| New Annotation | 5870              | 1.52               | 2p42                        |                   |
|                | 5872              | 1.18               |                             |                   |
|                | 5904              | 1.495              |                             |                   |
|                | 5975              | 1.324              |                             |                   |
|                | 6069              | 1.418              |                             |                   |
|                | 6097              | 1.125              |                             |                   |
|                | 6137              | 1.128              | 2q33                        |                   |
|                | 6176              | 1.777              | 1p33                        |                   |
|                | 6221              | 1.161              | 1p33                        |                   |
|                | 6234              | 1.191              |                             |                   |
|                | 6254              | 1.1691             |                             |                   |
|                | 6272              | 1.174              |                             |                   |
|                | 6289              | 1.293              |                             |                   |
|                | 6296              | 1.31               | 2p13                        |                   |
|                | 6311              | 1.442              |                             |                   |
|                | 6339              | 1.1171             |                             |                   |
|                | 6359              | 1.23               | 3p44                        |                   |
|                | 6383              | 1.384              | 1p32                        |                   |
|                | 6388              | 1.369              |                             |                   |
|                | 6501              | 1.488              |                             |                   |
|                | 6594              | 1.332              | 2p23                        |                   |
|                | 6619              | 1.352              | 2q11                        |                   |
|                | 6635              | 1.59               | 1p31                        |                   |
|                | 7008              | 1.791              |                             |                   |
|                | 7032              | 1.9                |                             |                   |
|                | 7125              | 1.73               | 1q41                        |                   |

**Non-Aedes Insect Genes (Pertaining to Fig. 2 and 3). (continued)**

|                | <b>Trinity ID</b> | <b>Supercontig</b> | <b>Chromosomal Location</b> | <b>Annotation</b> |
|----------------|-------------------|--------------------|-----------------------------|-------------------|
|                | 7131              | 1.201              |                             |                   |
|                | 7135              | 1.497              |                             |                   |
|                | 7147              | 1.307              |                             |                   |
|                | 7179              | 1.393              |                             |                   |
|                | 7184              | 1.341              | 2p44                        |                   |
|                | 7263              | 1.571              |                             |                   |
|                | 7299              | 1.36               | 2p42                        |                   |
|                | 7528              | 1.20               | 2p44                        |                   |
|                | 7783              | 1.1510             |                             |                   |
|                | 7791              | 1.244              |                             |                   |
|                | 7813              | 1.481              |                             |                   |
|                | 7819              | 1.656              |                             |                   |
| New Annotation | 7835              | 1.55               | 2q24                        |                   |
|                | 7941              | 1.251              |                             |                   |
|                | 8033              | 1.450              |                             |                   |
|                | 8089              | 1.191              |                             |                   |
|                | 8094              | 1.191              |                             |                   |
|                | 8096              | 1.117              | 1q33                        |                   |
|                | 8143              | 1.603              |                             |                   |
|                | 8326              | 1.542              |                             |                   |
|                | 8683              | 1.190              |                             |                   |
|                | 8697              | 1.123              | 1p12                        |                   |
|                | 8718              | 1.180              |                             |                   |
|                | 8865              | 1.268              |                             |                   |
|                | 8871              | 1.82               | 1q43                        |                   |
|                | 9039              | 1.932              |                             |                   |
|                | 9058              | 1.570              |                             |                   |
|                | 9337              | 1.210              |                             |                   |
|                | 9419              | 1.240              | 2q24                        |                   |
|                | 9431              | 1.80               |                             |                   |
| Ambiguous      | 1792              |                    |                             |                   |
|                | 4353              |                    |                             |                   |
|                | 6114              |                    |                             |                   |
|                | 6489              |                    |                             |                   |
|                | 6783              |                    |                             |                   |
|                | 7728              |                    |                             |                   |
|                | 7730              |                    |                             |                   |
|                | 8587              |                    |                             |                   |
|                | 8958              |                    |                             |                   |
|                | 9053              |                    |                             |                   |
| 9256           |                   |                    |                             |                   |
| No Match       | 909               |                    |                             |                   |
|                | 1051              |                    |                             |                   |
|                | 1589              |                    |                             |                   |
|                | 2357              |                    |                             |                   |
|                | 2623              |                    |                             |                   |

**Non-Aedes Insect Genes (Pertaining to Fig. 2 and 3). (continued)**

|          | <b>Trinity ID</b> | <b>Supercontig</b> | <b>Chromosomal Location</b> | <b>Annotation</b> |
|----------|-------------------|--------------------|-----------------------------|-------------------|
|          | 2727              |                    |                             |                   |
|          | 2974              |                    |                             |                   |
|          | 2995              |                    |                             |                   |
|          | 3026              |                    |                             |                   |
|          | 3093              |                    |                             |                   |
|          | 3098              |                    |                             |                   |
|          | 3210              |                    |                             |                   |
|          | 3392              |                    |                             |                   |
|          | 3427              |                    |                             |                   |
|          | 3846              |                    |                             |                   |
|          | 3852              |                    |                             |                   |
|          | 4288              |                    |                             |                   |
|          | 4479              |                    |                             |                   |
|          | 4862              |                    |                             |                   |
|          | 4878              |                    |                             |                   |
| No Match | 4957              |                    |                             |                   |
|          | 5502              |                    |                             |                   |
|          | 6146              |                    |                             |                   |
|          | 6464              |                    |                             |                   |
|          | 6478              |                    |                             |                   |
|          | 6902              |                    |                             |                   |
|          | 7255              |                    |                             |                   |
|          | 7354              |                    |                             |                   |
|          | 7441              |                    |                             |                   |
|          | 7737              |                    |                             |                   |
|          | 7801              |                    |                             |                   |
|          | 7893              |                    |                             |                   |
|          | 7912              |                    |                             |                   |
|          | 8485              |                    |                             |                   |
|          | 9050              |                    |                             |                   |
|          | 9227              |                    |                             |                   |
|          | 9273              |                    |                             |                   |
|          | 9393              |                    |                             |                   |
