# Supplementary material for: Proteomics informed by transcriptomics for characterising active transposable elements and genome annotation in Aedes aegypti
Source: PubMed Central journal article supplement (PMC5248466; doi:10.1186/s12864-016-3432-5), 2017-01-19
Supplement: 12864_2016_3432_MOESM4_ESM.pdf [file 12864_2016_3432_MOESM4_ESM.pdf]

Complete TE Proteome Detected By PIT in Aag2 Cells.

| Class   | Order/Subclass | Clade/Superfamily | Element            | ORF        | TEfam ID        | Mosquito*                 | PIT AA Length | Query Cover | Identity   | Trinity ID  |
|---------|----------------|-------------------|--------------------|------------|-----------------|---------------------------|---------------|-------------|------------|-------------|
| Class I | LTR            | BEL               | Ele1               | gag        | TF000042        | <i>Ae. aegypti</i>        | 811           | 99%         | 48%        | 402         |
|         |                |                   | Ele1               | gag        | TF000042        | <i>Ae. aegypti</i>        | 1269          | 76%         | 42%        | 955         |
|         |                |                   | Ele1               | gag        | TF000042        | <i>Ae. aegypti</i>        | 1933          | 84%         | 44%        | 956         |
|         |                |                   | Ele10              | gag        | TF000092        | <i>Ae. aegypti</i>        | 815           | 99%         | 44%        | 2271        |
|         |                |                   | <b>Ele10</b>       | <b>gag</b> | <b>TF000092</b> | <b><i>Ae. aegypti</i></b> | <b>1168</b>   | <b>99%</b>  | <b>33%</b> | <b>3264</b> |
|         |                |                   | Ele10              | gag        | TF000092        | <i>Ae. aegypti</i>        | 949           | 99%         | 48%        | 4868        |
|         |                |                   | Ele10              | gag        | TF000092        | <i>Ae. aegypti</i>        | 767           | 99%         | 47%        | 4869        |
|         |                |                   | Ele45              | gag        | TF000244        | <i>Ae. aegypti</i>        | 69            | 89%         | 68%        | 6477        |
|         |                |                   | Ele77              | pol        | TF000260        | <i>Ae. aegypti</i>        | 104           | 99%         | 85%        | 9231        |
|         |                |                   | Ele97              | gag        | TF000270        | <i>Ae. aegypti</i>        | 161           | 100%        | 90%        | 4488        |
|         |                |                   | Ele23              | gag        | TF000278        | <i>Ae. aegypti</i>        | 336           | 99%         | 83%        | 3203        |
|         |                |                   | Ele121             | gag        | TF000282        | <i>Ae. aegypti</i>        | 812           | 71%         | 65%        | 7201        |
|         |                |                   | Ele147             | gag        | TF000295        | <i>Ae. aegypti</i>        | 444           | 99%         | 72%        | 5203        |
|         |                |                   | Ele147             | gag        | TF000295        | <i>Ae. aegypti</i>        | 207           | 100%        | 76%        | 9023        |
|         |                |                   | Ele153             | gag        | TF000298        | <i>Ae. aegypti</i>        | 83            | 100%        | 100%       | 8309        |
|         |                |                   | <b>Ele181</b>      | <b>gag</b> | <b>TF000313</b> | <b><i>Ae. aegypti</i></b> | <b>104</b>    | <b>100%</b> | <b>64%</b> | <b>3381</b> |
|         |                |                   | Ele24              | gag        | TF000326        | <i>Ae. aegypti</i>        | 177           | 100%        | 69%        | 4222        |
|         |                |                   | Ele26              | gag        | TF000327        | <i>Ae. aegypti</i>        | 357           | 97%         | 72%        | 3396        |
|         |                |                   | Ele34              | gag        | TF000332        | <i>Ae. aegypti</i>        | 139           | 99%         | 80%        | 4720        |
|         |                |                   | Ele227             | gag        | TF000507        | <i>Ae. aegypti</i>        | 73            | 100%        | 100%       | 9160        |
| Ele84   | gag            | TF000514          | <i>Ae. aegypti</i> | 196        | 100%            | 60%                       | 5873          |             |            |             |

Complete TE Proteome Detected By PIT in Aag2 Cells. (continued)

| Class   | Order/Subclass | Clade/Superfamily | Element      | ORF        | TEfam ID        | Mosquito*                          | PIT AA Length | Query Cover     | Identity                  | Trinity ID  |            |            |             |
|---------|----------------|-------------------|--------------|------------|-----------------|------------------------------------|---------------|-----------------|---------------------------|-------------|------------|------------|-------------|
| Class I | LTR            | BEL               | Ele86        | gag        | TF000515        | <i>Ae. aegypti</i>                 | 88            | 100%            | 53%                       | 5754        |            |            |             |
|         |                |                   | Ele90        | gag        | TF000517        | <i>Ae. aegypti</i>                 | 572           | 99%             | 48%                       | 5158        |            |            |             |
|         |                |                   | Ele226       | gag        | TF000777        | <i>Ae. aegypti</i>                 | 267           | 100%            | 87%                       | 8358        |            |            |             |
|         |                |                   | Ele220       | gag        | TF000788        | <i>Ae. aegypti</i>                 | 83            | 93%             | 38%                       | 1400        |            |            |             |
|         |                |                   | Ele204       | gag        | TF000800        | <i>Ae. aegypti</i>                 | 80            | 93%             | 57%                       | 6338        |            |            |             |
|         |                |                   | Ele24        | gag        | TF003410        | <i>An. gambiae</i>                 | 286           | 97%             | 58%                       | 5038        |            |            |             |
|         |                |                   | <b>Ele24</b> | <b>gag</b> | <b>TF001456</b> | <b><i>Cx. quinquefasciatus</i></b> | <b>435</b>    | <b>95%</b>      | <b>62%</b>                | <b>5543</b> |            |            |             |
|         |                |                   | Ele24        | gag        | TF001456        | <i>Cx. quinquefasciatus</i>        | 154           | 95%             | 48%                       | 6976        |            |            |             |
|         |                |                   | Ele24        | gag        | TF001456        | <i>Cx. quinquefasciatus</i>        | 388           | 100%            | 74%                       | 7002        |            |            |             |
|         |                |                   | <b>Ele23</b> | <b>gag</b> | <b>TF001470</b> | <b><i>Cx. quinquefasciatus</i></b> | <b>778</b>    | <b>95%</b>      | <b>43%</b>                | <b>6977</b> |            |            |             |
|         |                |                   | Ele51        | gag        | TF001550        | <i>Cx. quinquefasciatus</i>        | 116           | 82%             | 38%                       | 4423        |            |            |             |
|         |                |                   | Ele68        | gag        | TF001567        | <i>Cx. quinquefasciatus</i>        | 202           | 99%             | 65%                       | 6696        |            |            |             |
|         |                |                   | Ele68        | gag        | TF001567        | <i>Cx. quinquefasciatus</i>        | 149           | 100%            | 77%                       | 7991        |            |            |             |
|         |                |                   |              |            | Ty1/copia       | <b>Ele1</b>                        | <b>pol</b>    | <b>TF000130</b> | <b><i>Ae. aegypti</i></b> | <b>1176</b> | <b>81%</b> | <b>42%</b> | <b>2155</b> |
|         |                |                   |              |            |                 | Ele39                              | gag           | TF000661        | <i>Ae. aegypti</i>        | 689         | 94%        | 99%        | 3822        |
|         |                |                   | Ele188       | gag        | TF001077        | <i>Ae. aegypti</i>                 | 774           | 69%             | 62%                       | 6729        |            |            |             |
|         |                |                   | Ele2         | gag        | TF003443        | <i>An. gambiae</i>                 | 88            | 100%            | 69%                       | 6307        |            |            |             |
|         |                |                   | Ele4         | gag        | TF003445        | <i>An. gambiae</i>                 | 108           | 76%             | 75%                       | 4632        |            |            |             |
|         |                |                   | Ele8         | gag        | TF003449        | <i>An. gambiae</i>                 | 139           | 94%             | 70%                       | 5994        |            |            |             |
|         |                |                   | Ele12        | gag        | TF003453        | <i>An. gambiae</i>                 | 115           | 100%            | 63%                       | 192         |            |            |             |
|         |                |                   | Ele12        | gag        | TF003453        | <i>An. gambiae</i>                 | 249           | 97%             | 73%                       | 2237        |            |            |             |

Complete TE Proteome Detected By PIT in Aag2 Cells. (continued)

| Class   | Order/Subclass | Clade/Superfamily | Element      | ORF        | TEfam ID        | Mosquito*                          | PIT AA Length | Query Cover | Identity           | Trinity ID  |      |      |      |
|---------|----------------|-------------------|--------------|------------|-----------------|------------------------------------|---------------|-------------|--------------------|-------------|------|------|------|
| Class I | LTR            | Ty1/copia         | Ele8         | gag        | TF001523        | <i>Cx. quinquefasciatus</i>        | 155           | 94%         | 53%                | 4022        |      |      |      |
|         |                |                   | Ele9         | gag        | TF001524        | <i>Cx. quinquefasciatus</i>        | 110           | 92%         | 82%                | 2080        |      |      |      |
|         |                |                   | Ele9         | gag        | TF001524        | <i>Cx. quinquefasciatus</i>        | 114           | 57%         | 41%                | 5800        |      |      |      |
|         |                |                   | Ele9         | gag        | TF001524        | <i>Cx. quinquefasciatus</i>        | 121           | 99%         | 63%                | 8491        |      |      |      |
|         |                |                   | Ele14        | gag        | TF001529        | <i>Cx. quinquefasciatus</i>        | 118           | 98%         | 59%                | 6400        |      |      |      |
|         |                |                   | Ele17        | gag        | TF001581        | <i>Cx. quinquefasciatus</i>        | 162           | 85%         | 65%                | 4571        |      |      |      |
|         |                |                   | Ele18        | gag        | TF001582        | <i>Cx. quinquefasciatus</i>        | 526           | 99%         | 47%                | 4431        |      |      |      |
|         |                |                   | <b>Ele19</b> | <b>gag</b> | <b>TF001583</b> | <b><i>Cx. quinquefasciatus</i></b> | <b>276</b>    | <b>85%</b>  | <b>43%</b>         | <b>3370</b> |      |      |      |
|         |                |                   | Ele26        | gag        | TF001590        | <i>Cx. quinquefasciatus</i>        | 444           | 96%         | 61%                | 298         |      |      |      |
|         |                |                   | Ele32        | gag        | TF001594        | <i>Cx. quinquefasciatus</i>        | 195           | 82%         | 72%                | 6132        |      |      |      |
|         |                |                   | Ele32        | gag        | TF001594        | <i>Cx. quinquefasciatus</i>        | 122           | 71%         | 69%                | 6133        |      |      |      |
|         |                |                   | Ele34        | gag        | TF001596        | <i>Cx. quinquefasciatus</i>        | 294           | 99%         | 55%                | 8976        |      |      |      |
|         |                |                   |              |            | Ty3/gypsy       | Ele7                               | pol           | TF000099    | <i>Ae. aegypti</i> | 134         | 100% | 99%  | 8866 |
|         |                |                   |              |            |                 | Ele19                              | gag           | TF000110    | <i>Ae. aegypti</i> | 125         | 100% | 100% | 2793 |
|         |                |                   | Ele26        | gag        | TF000117        | <i>Ae. aegypti</i>                 | 206           | 92%         | 98%                | 4178        |      |      |      |
|         |                |                   | <b>Ele26</b> | <b>gag</b> | <b>TF000117</b> | <b><i>Ae. aegypti</i></b>          | <b>1428</b>   | <b>74%</b>  | <b>35%</b>         | <b>6210</b> |      |      |      |
|         |                |                   | <b>Ele26</b> | <b>gag</b> | <b>TF000117</b> | <b><i>Ae. aegypti</i></b>          | <b>1298</b>   | <b>93%</b>  | <b>35%</b>         | <b>8288</b> |      |      |      |
|         |                |                   | <b>Ele28</b> | <b>gag</b> | <b>TF000119</b> | <b><i>Ae. aegypti</i></b>          | <b>115</b>    | <b>84%</b>  | <b>39%</b>         | <b>1383</b> |      |      |      |
|         |                |                   | <b>Ele28</b> | <b>gag</b> | <b>TF000119</b> | <b><i>Ae. aegypti</i></b>          | <b>174</b>    | <b>89%</b>  | <b>43%</b>         | <b>452</b>  |      |      |      |
|         |                |                   | Ele29        | gag        | TF000120        | <i>Ae. aegypti</i>                 | 350           | 89%         | 46%                | 7939        |      |      |      |
|         |                |                   | Ele30        | pol        | TF000121        | <i>Ae. aegypti</i>                 | 497           | 99%         | 59%                | 2218        |      |      |      |

Complete TE Proteome Detected By PIT in Aag2 Cells. (continued)

| Class   | Order/Subclass | Clade/Superfamily | Element            | ORF        | TEfam ID        | Mosquito*                 | PIT AA Length | Query Cover | Identity    | Trinity ID  |
|---------|----------------|-------------------|--------------------|------------|-----------------|---------------------------|---------------|-------------|-------------|-------------|
| Class I | LTR            | Ty3/gypsy         | Ele32              | gag        | TF000123        | <i>Ae. aegypti</i>        | 202           | 94%         | 77%         | 3616        |
|         |                |                   | Ele33              | pol        | TF000124        | <i>Ae. aegypti</i>        | 199           | 96%         | 69%         | 4176        |
|         |                |                   | <b>Ele40</b>       | <b>gag</b> | <b>TF000135</b> | <b><i>Ae. aegypti</i></b> | <b>338</b>    | <b>100%</b> | <b>100%</b> | <b>5565</b> |
|         |                |                   | Ele43              | pol        | TF000138        | <i>Ae. aegypti</i>        | 86            | 86%         | 65%         | 2550        |
|         |                |                   | Ele50              | 'env'      | TF000145        | <i>Ae. aegypti</i>        | 242           | 100%        | 97%         | 4625        |
|         |                |                   | Ele50              | 'env'      | TF000145        | <i>Ae. aegypti</i>        | 137           | 100%        | 85%         | 4626        |
|         |                |                   | Ele54              | 'env'      | TF000317        | <i>Ae. aegypti</i>        | 533           | 100%        | 99%         | 7261        |
|         |                |                   | Ele55              | 'env'      | TF000318        | <i>Ae. aegypti</i>        | 250           | 100%        | 99%         | 2813        |
|         |                |                   | Ele65              | gag        | TF000337        | <i>Ae. aegypti</i>        | 463           | 100%        | 53%         | 6239        |
|         |                |                   | Ele68              | gag        | TF000340        | <i>Ae. aegypti</i>        | 409           | 99%         | 66%         | 4711        |
|         |                |                   | Ele69              | gag        | TF000341        | <i>Ae. aegypti</i>        | 468           | 97%         | 98%         | 3730        |
|         |                |                   | Ele83              | gag        | TF000368        | <i>Ae. aegypti</i>        | 85            | 98%         | 54%         | 4772        |
|         |                |                   | Ele84              | 'env'      | TF000369        | <i>Ae. aegypti</i>        | 192           | 80%         | 62%         | 4205        |
|         |                |                   | <b>Ele97</b>       | <b>gag</b> | <b>TF000379</b> | <b><i>Ae. aegypti</i></b> | <b>751</b>    | <b>99%</b>  | <b>44%</b>  | <b>2546</b> |
|         |                |                   | Ele98              | pol        | TF000380        | <i>Ae. aegypti</i>        | 205           | 98%         | 57%         | 6938        |
|         |                |                   | Ele101             | gag        | TF000382        | <i>Ae. aegypti</i>        | 80            | 100%        | 96%         | 5479        |
|         |                |                   | Ele104             | pol        | TF000385        | <i>Ae. aegypti</i>        | 492           | 100%        | 99%         | 5488        |
|         |                |                   | Ele107             | gag        | TF000388        | <i>Ae. aegypti</i>        | 212           | 99%         | 46%         | 8265        |
|         |                |                   | Ele113             | gag        | TF000413        | <i>Ae. aegypti</i>        | 73            | 100%        | 89%         | 5360        |
|         |                |                   | Ele120             | gag        | TF000417        | <i>Ae. aegypti</i>        | 78            | 83%         | 45%         | 6629        |
| Ele121  | 'env'          | TF000418          | <i>Ae. aegypti</i> | 107        | 80%             | 48%                       | 5210          |             |             |             |

Complete TE Proteome Detected By PIT in Aag2 Cells. (continued)

| Class   | Order/Subclass | Clade/Superfamily | Element      | ORF        | TEfam ID        | Mosquito*                          | PIT AA Length | Query Cover | Identity              | Trinity ID  |     |     |      |
|---------|----------------|-------------------|--------------|------------|-----------------|------------------------------------|---------------|-------------|-----------------------|-------------|-----|-----|------|
| Class I | LTR            | Ty3/gypsy         | Ele122       | 'env'      | TF000419        | <i>Ae. aegypti</i>                 | 102           | 100%        | 100%                  | 8311        |     |     |      |
|         |                |                   | Ele154       | gag        | TF000540        | <i>Ae. aegypti</i>                 | 282           | 100%        | 99%                   | 656         |     |     |      |
|         |                |                   | Ele156       | gag        | TF000542        | <i>Ae. aegypti</i>                 | 310           | 99%         | 55%                   | 8637        |     |     |      |
|         |                |                   | Ele158       | pol        | TF000544        | <i>Ae. aegypti</i>                 | 141           | 100%        | 77%                   | 7310        |     |     |      |
|         |                |                   | Ele158       | pol        | TF000544        | <i>Ae. aegypti</i>                 | 237           | 100%        | 80%                   | 7311        |     |     |      |
|         |                |                   | Ele190       | gag        | TF000932        | <i>Ae. aegypti</i>                 | 287           | 78%         | 67%                   | 2732        |     |     |      |
|         |                |                   | Ele183       | pol        | TF000936        | <i>Ae. aegypti</i>                 | 98            | 97%         | 59%                   | 2091        |     |     |      |
|         |                |                   | Ele178       | pol        | TF000940        | <i>Ae. aegypti</i>                 | 110           | 100%        | 66%                   | 2436        |     |     |      |
|         |                |                   | Ele10        | pol        | TF002594        | <i>An. arabiensis</i>              | 290           | 94%         | 50%                   | 6559        |     |     |      |
|         |                |                   | Ele50        | gag        | TF003509        | <i>An. gambiae</i>                 | 138           | 55%         | 57%                   | 9384        |     |     |      |
|         |                |                   | <b>Ele6</b>  | <b>gag</b> | <b>TF002676</b> | <b><i>An. stephensi</i></b>        | <b>728</b>    | <b>100%</b> | <b>57%</b>            | <b>724</b>  |     |     |      |
|         |                |                   | Ele20        | gag        | TF001499        | <i>Cx. quinquefasciatus</i>        | 451           | 93%         | 43%                   | 8125        |     |     |      |
|         |                |                   | <b>Ele22</b> | <b>gag</b> | <b>TF001500</b> | <b><i>Cx. quinquefasciatus</i></b> | <b>359</b>    | <b>65%</b>  | <b>35%</b>            | <b>2678</b> |     |     |      |
|         |                |                   | Ele22        | gag        | TF001500        | <i>Cx. quinquefasciatus</i>        | 87            | 100%        | 64%                   | 9423        |     |     |      |
|         |                |                   | Ele23        | gag        | TF001503        | <i>Cx. quinquefasciatus</i>        | 129           | 93%         | 71%                   | 8790        |     |     |      |
|         |                |                   | <b>Ele40</b> | <b>gag</b> | <b>TF001597</b> | <b><i>Cx. quinquefasciatus</i></b> | <b>677</b>    | <b>100%</b> | <b>49%</b>            | <b>1630</b> |     |     |      |
|         |                |                   | Ele59        | gag        | TF001606        | <i>Cx. quinquefasciatus</i>        | 69            | 60%         | 43%                   | 5794        |     |     |      |
|         |                |                   | Ele50        | pol        | TF001609        | <i>Cx. quinquefasciatus</i>        | 131           | 100%        | 74%                   | 3989        |     |     |      |
|         |                |                   |              | Non-LTR    | CR1             | Ele18                              | ORF2          | TF002960    | <i>An. dirus</i>      | 104         | 94% | 39% | 3859 |
|         |                |                   |              |            |                 | Ele6                               | ORF2          | TF002797    | <i>An. epiroticus</i> | 114         | 95% | 35% | 3922 |
|         |                |                   | Ele3         | ORF1       | TF001345        | <i>An. gambiae</i>                 | 193           | 89%         | 32%                   | 1306        |     |     |      |

Complete TE Proteome Detected By PIT in Aag2 Cells. (continued)

| Class   | Order/Subclass | Clade/Superfamily | Element | ORF  | TEfam ID | Mosquito*             | PIT AA Length | Query Cover | Identity | Trinity ID |
|---------|----------------|-------------------|---------|------|----------|-----------------------|---------------|-------------|----------|------------|
| Class I | Non-LTR        | CR1               |         | ORF2 | TF001349 | <i>An. gambiae</i>    | 579           | 98%         | 47%      | 5304       |
|         |                |                   | Ele1    | ORF2 | TF003184 | <i>An. merus</i>      | 77            | 88%         | 53%      | 4275       |
|         |                |                   | Ele16   | ORF2 | TF003213 | <i>An. merus</i>      | 137           | 99%         | 47%      | 4445       |
|         |                |                   | Ele24   | ORF2 | TF003221 | <i>An. merus</i>      | 561           | 95%         | 38%      | 3559       |
|         |                | I factor          | Ele1    | ORF2 | TF000020 | <i>Ae. aegypti</i>    | 116           | 100%        | 60%      | 2555       |
|         |                |                   | Ele1    | ORF2 | TF000020 | <i>Ae. aegypti</i>    | 188           | 96%         | 30%      | 3042       |
|         |                |                   | Ele1    | ORF2 | TF000020 | <i>Ae. aegypti</i>    | 213           | 97%         | 30%      | 4861       |
|         |                | Jockey            | Ele1    | ORF2 | TF000019 | <i>Ae. aegypti</i>    | 450           | 100%        | 99%      | 4096       |
|         |                |                   | Ele3    | ORF2 | TF000069 | <i>Ae. aegypti</i>    | 78            | 91%         | 54%      | 1382       |
|         |                |                   | Ele3    | ORF2 | TF000069 | <i>Ae. aegypti</i>    | 303           | 98%         | 57%      | 8938       |
|         |                | L1                | Ele5    | ORF1 | TF000086 | <i>An. gambiae</i>    | 149           | 82%         | 42%      | 2159       |
|         |                |                   | Ele2    | ORF2 | TF001353 | <i>An. gambiae</i>    | 134           | 94%         | 52%      | 908        |
|         |                |                   | Ele4    | ORF2 | TF003258 | <i>An. merus</i>      | 223           | 99%         | 38%      | 4791       |
|         |                | LOA               | Ele1    | ORF1 | TF000021 | <i>Ae. aegypti</i>    | 196           | 97%         | 39%      | 5533       |
|         |                |                   | Ele1    | ORF1 | TF000021 | <i>Ae. aegypti</i>    | 252           | 99%         | 35%      | 6238       |
|         |                | Loner             | Ele2    | ORF2 | TF003111 | <i>An. funestus</i>   | 78            | 98%         | 62%      | 7445       |
|         |                |                   | Ele3    | ORF2 | TF003112 | <i>An. funestus</i>   | 82            | 90%         | 47%      | 2728       |
|         |                | Outcast           | Ele5    | ORF2 | TF002548 | <i>An. arabiensis</i> | 146           | 69%         | 39%      | 4721       |
|         |                |                   | Ele6    | ORF2 | TF000083 | <i>An. gambiae</i>    | 126           | 84%         | 38%      | 4873       |
|         |                |                   | Ele4    | ORF2 | TF003267 | <i>An. merus</i>      | 294           | 98%         | 44%      | 314        |
|         |                | R1                | Ele5    | ORF2 | TF002830 | <i>An. epiroticus</i> | 114           | 76%         | 46%      | 1402       |

Complete TE Proteome Detected By PIT in Aag2 Cells. (continued)

| Class    | Order/Subclass | Clade/Superfamily | Element     | ORF                         | TEfam ID        | Mosquito*                          | PIT AA Length | Query Cover | Identity   | Trinity ID  |
|----------|----------------|-------------------|-------------|-----------------------------|-----------------|------------------------------------|---------------|-------------|------------|-------------|
| Class I  | Non-LTR        | R4                | Ele1        | ORF1                        | TF000040        | <i>Ae. aegypti</i>                 | 82            | 95%         | 99%        | 6342        |
|          |                | RTE               | Ele3        | ORF2                        | TF002839        | <i>An. epiroticus</i>              | 97            | 100%        | 59%        | 4841        |
|          |                |                   | Ele2        | ORF1                        | TF001352        | <i>An. gambiae</i>                 | 63            | 53%         | 38%        | 9463        |
| Class II | Cut and Paste  | hAT               | Ele8        | ORF1                        | TF001635        | <i>Cx. quinquefasciatus</i>        | 234           | 96%         | 37%        | 6151        |
|          |                | Mutator           | 1.1         | ORF1                        | TF001628        | <i>Cx. quinquefasciatus</i>        | 398           | 92%         | 32%        | 4663        |
|          |                | Tc1-Mariner       | <b>Ele3</b> | <b>ORF1</b>                 | <b>TF001534</b> | <b><i>Cx. quinquefasciatus</i></b> | <b>159</b>    | <b>93%</b>  | <b>33%</b> | <b>5639</b> |
|          |                |                   | Ele3        | ORF1                        | TF001534        | <i>Cx. quinquefasciatus</i>        | 82            | 100%        | 78%        | 5750        |
|          |                |                   | <b>Ele7</b> | <b>ORF1</b>                 | <b>TF001538</b> | <b><i>Cx. quinquefasciatus</i></b> | <b>195</b>    | <b>52%</b>  | <b>31%</b> | <b>3084</b> |
|          |                |                   | Ele7        | ORF1                        | TF001538        | <i>Cx. quinquefasciatus</i>        | 79            | 91%         | 40%        | 6452        |
|          |                |                   | Ele7        | ORF1                        | TF001538        | <i>Cx. quinquefasciatus</i>        | 87            | 95%         | 54%        | 6680        |
|          | Ele1           | ORF1              | TF001539    | <i>Cx. quinquefasciatus</i> | 207             | 99%                                | 73%           | 6526        |            |             |

\* Mosquito genome in which TEfam element was originally described.

Bold typeface indicates Trinity transcripts associated with two or more peptides.
